# Supplementary material
Source: PubMed Central journal article supplement (PMC7722229)

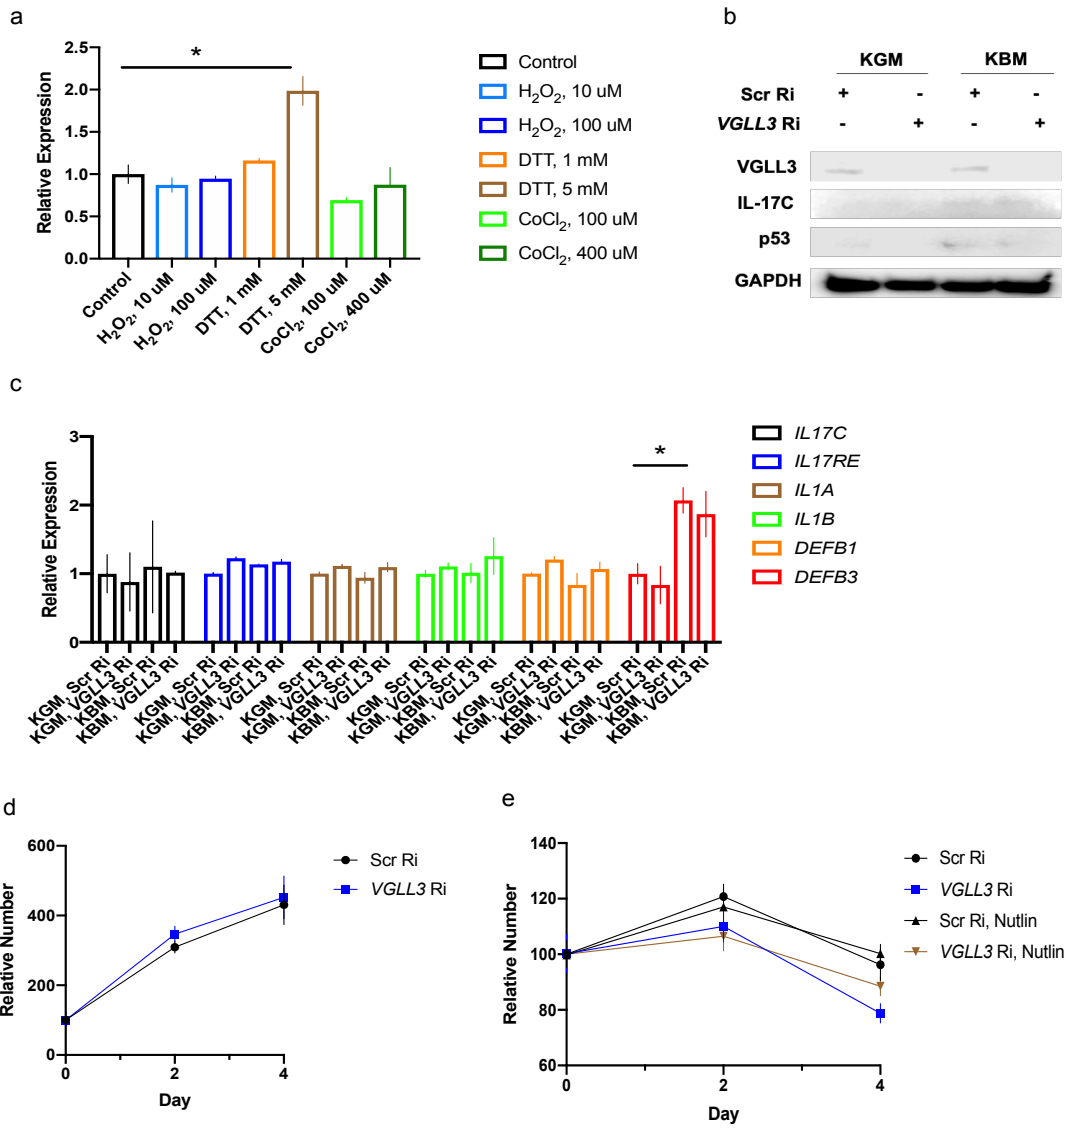

Supplemental Figure 1

Supplement: NIHMS1635367-supplement-SuppFig1.pdf [file NIHMS1635367-supplement-SuppFig1.pdf]

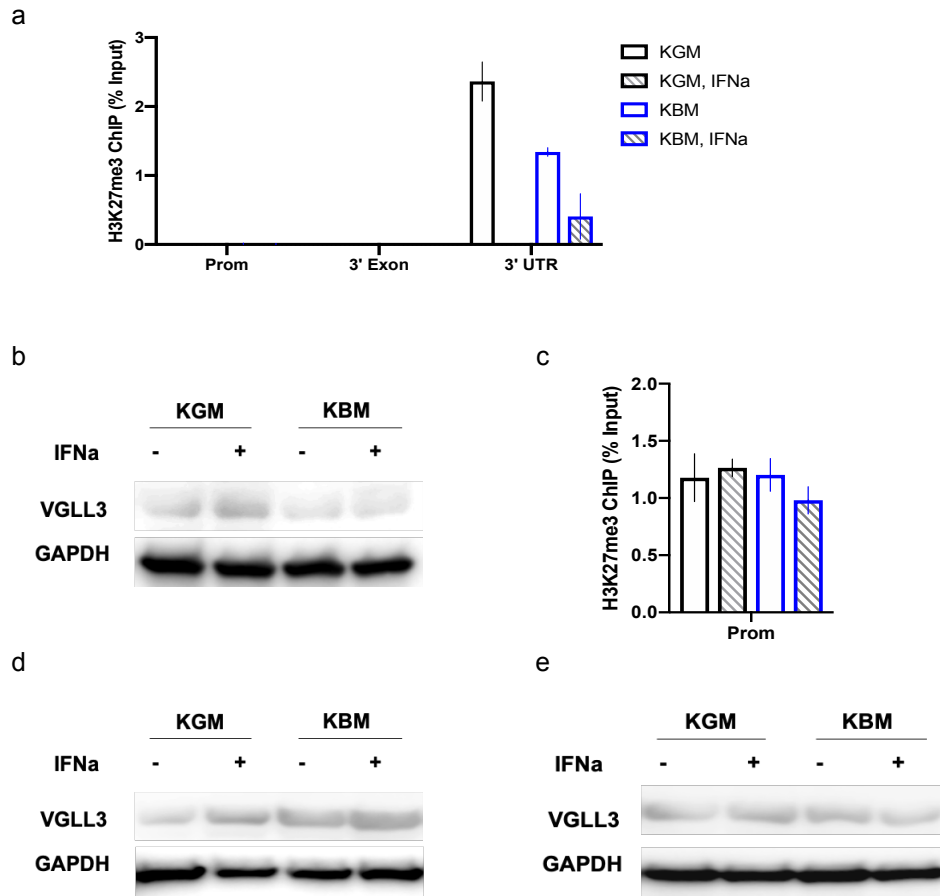

**Supplemental Figure 2**

Supplement: NIHMS1635367-supplement-SuppFig2.pdf [file NIHMS1635367-supplement-SuppFig2.pdf]

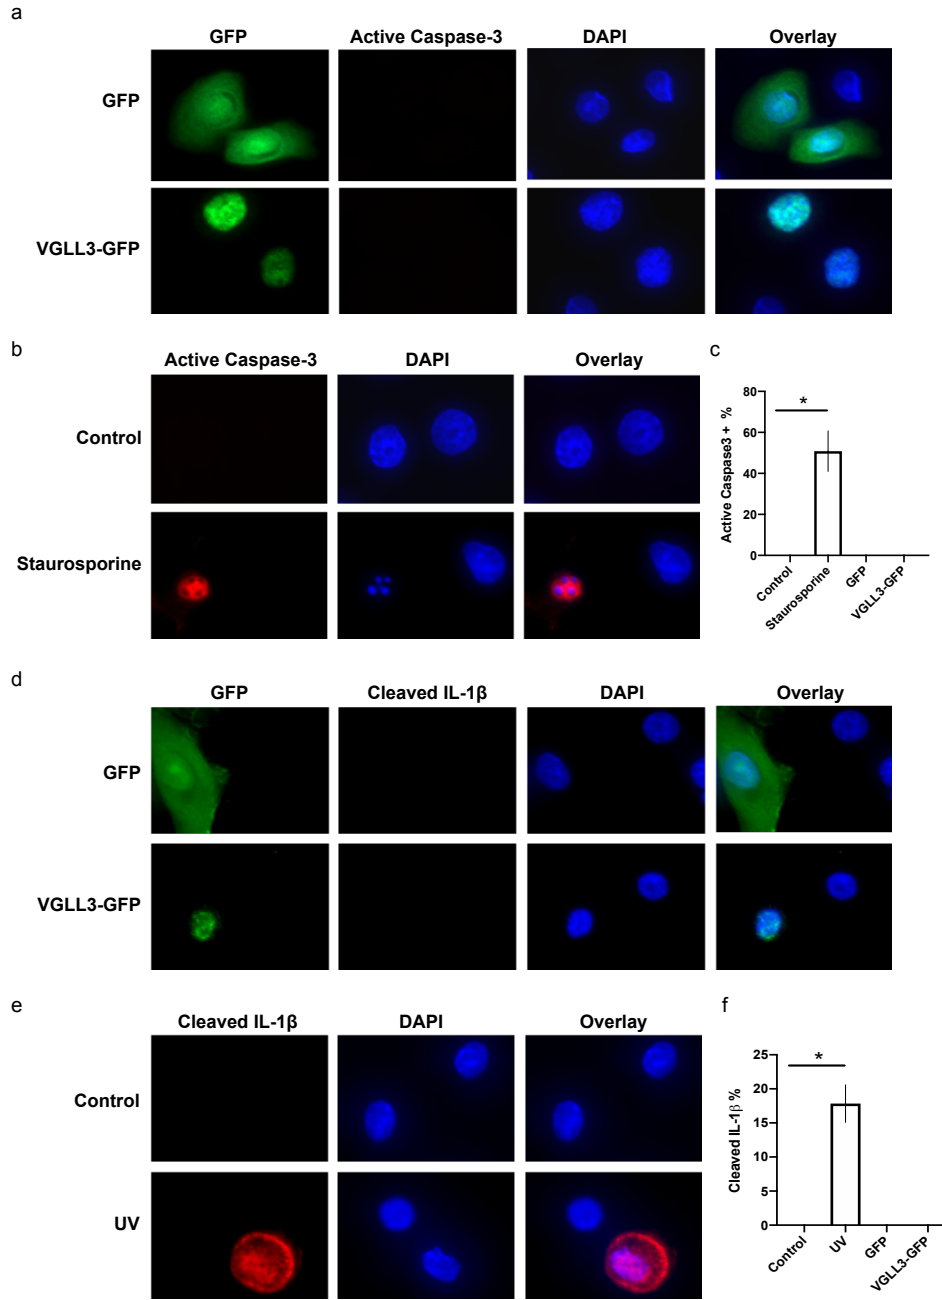

**Supplemental Figure 3**

Supplement: NIHMS1635367-supplement-SuppFig3.pdf [file NIHMS1635367-supplement-SuppFig3.pdf]

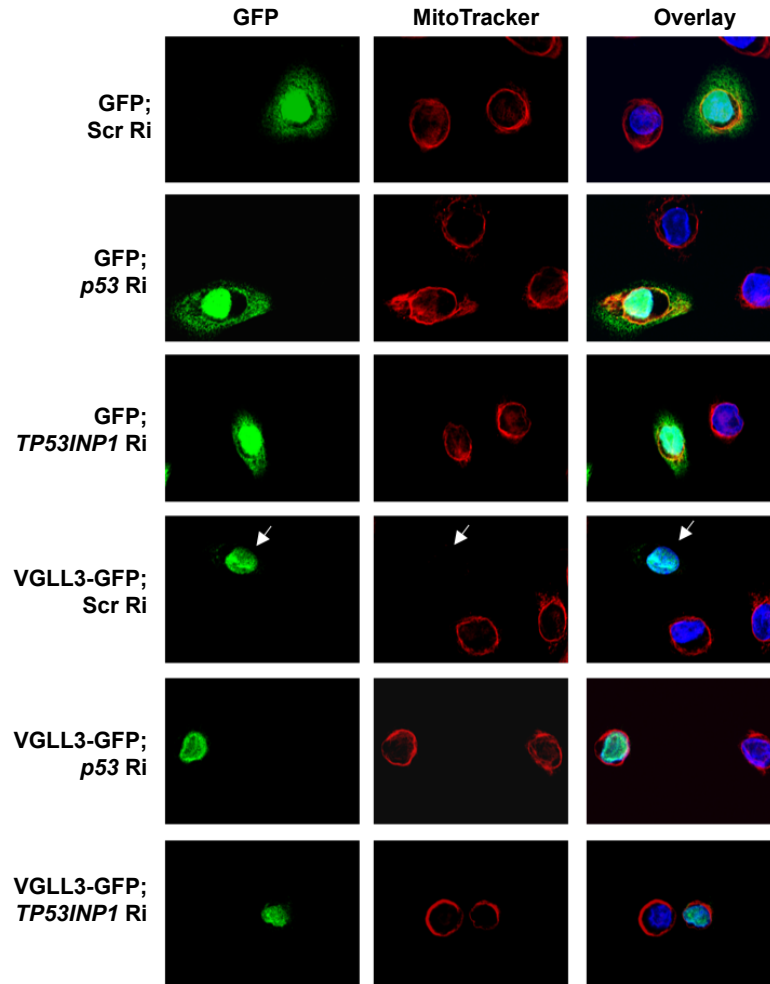

Supplemental Figure 4

Supplement: NIHMS1635367-supplement-SuppFig4.pdf [file NIHMS1635367-supplement-SuppFig4.pdf]

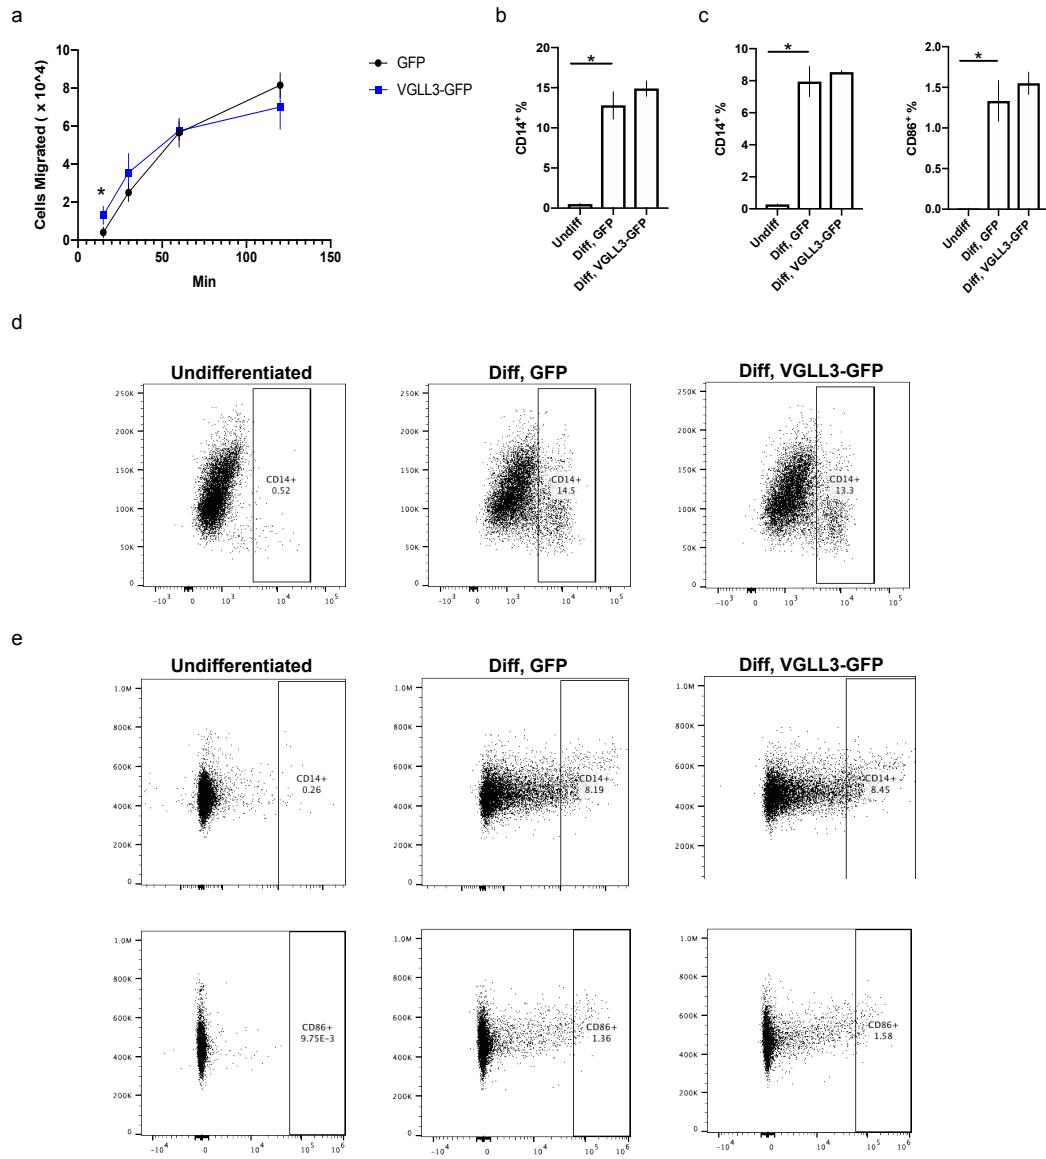

Supplemental Figure 5

Supplement: NIHMS1635367-supplement-SuppFig5.pdf [file NIHMS1635367-supplement-SuppFig5.pdf]
